# Supplementary material
Source: publisher site journal article supplement (https://www.spandidos-publications.com/6936/downloadSupplementary)
Supplement: Supplementary file 1 [file downloadSupplementary]

Table SI. Detailed information about the antibodies.

| Name                                             | Supplier                        | Catalogue number | Dilution | Temperature        | Duration of incubation |
|--------------------------------------------------|---------------------------------|------------------|----------|--------------------|------------------------|
| Estrogen Receptor $\alpha$ (D8H8) Rabbit mAb     | Cell Signaling Technology, Inc. | 8644             | 1:100    | Indoor temperature | 45 min                 |
| Progesterone Receptor A/B (D8Q2J) XP® Rabbit mAb | Cell Signaling Technology, Inc. | 8757             | 1:100    | Indoor temperature | 45 min                 |
| Ki-67 (D3B5) Rabbit mAb                          | Cell Signaling Technology, Inc. | 9129             | 1:100    | Indoor temperature | 45 min                 |
| p53 (7F5) Rabbit mAb                             | Cell Signaling Technology, Inc. | 2527             | 1:100    | Indoor temperature | 45 min                 |
| Polymer HRP Goat Anti Rabbit IgG (H+L)           | ImmunoWay Biotechnology Company | RS0011           | 1:500    | Indoor temperature | 30 min                 |
| DAB color development kit                        | ImmunoWay Biotechnology Company | RS0051           | /        | /                  | /                      |
